# Supplementary material
Source: PubMed Central journal article supplement (PMC10811272)
Supplement: NIHMS1916618-supplement-Fig_S1.pdf [file NIHMS1916618-supplement-Fig_S1.pdf]

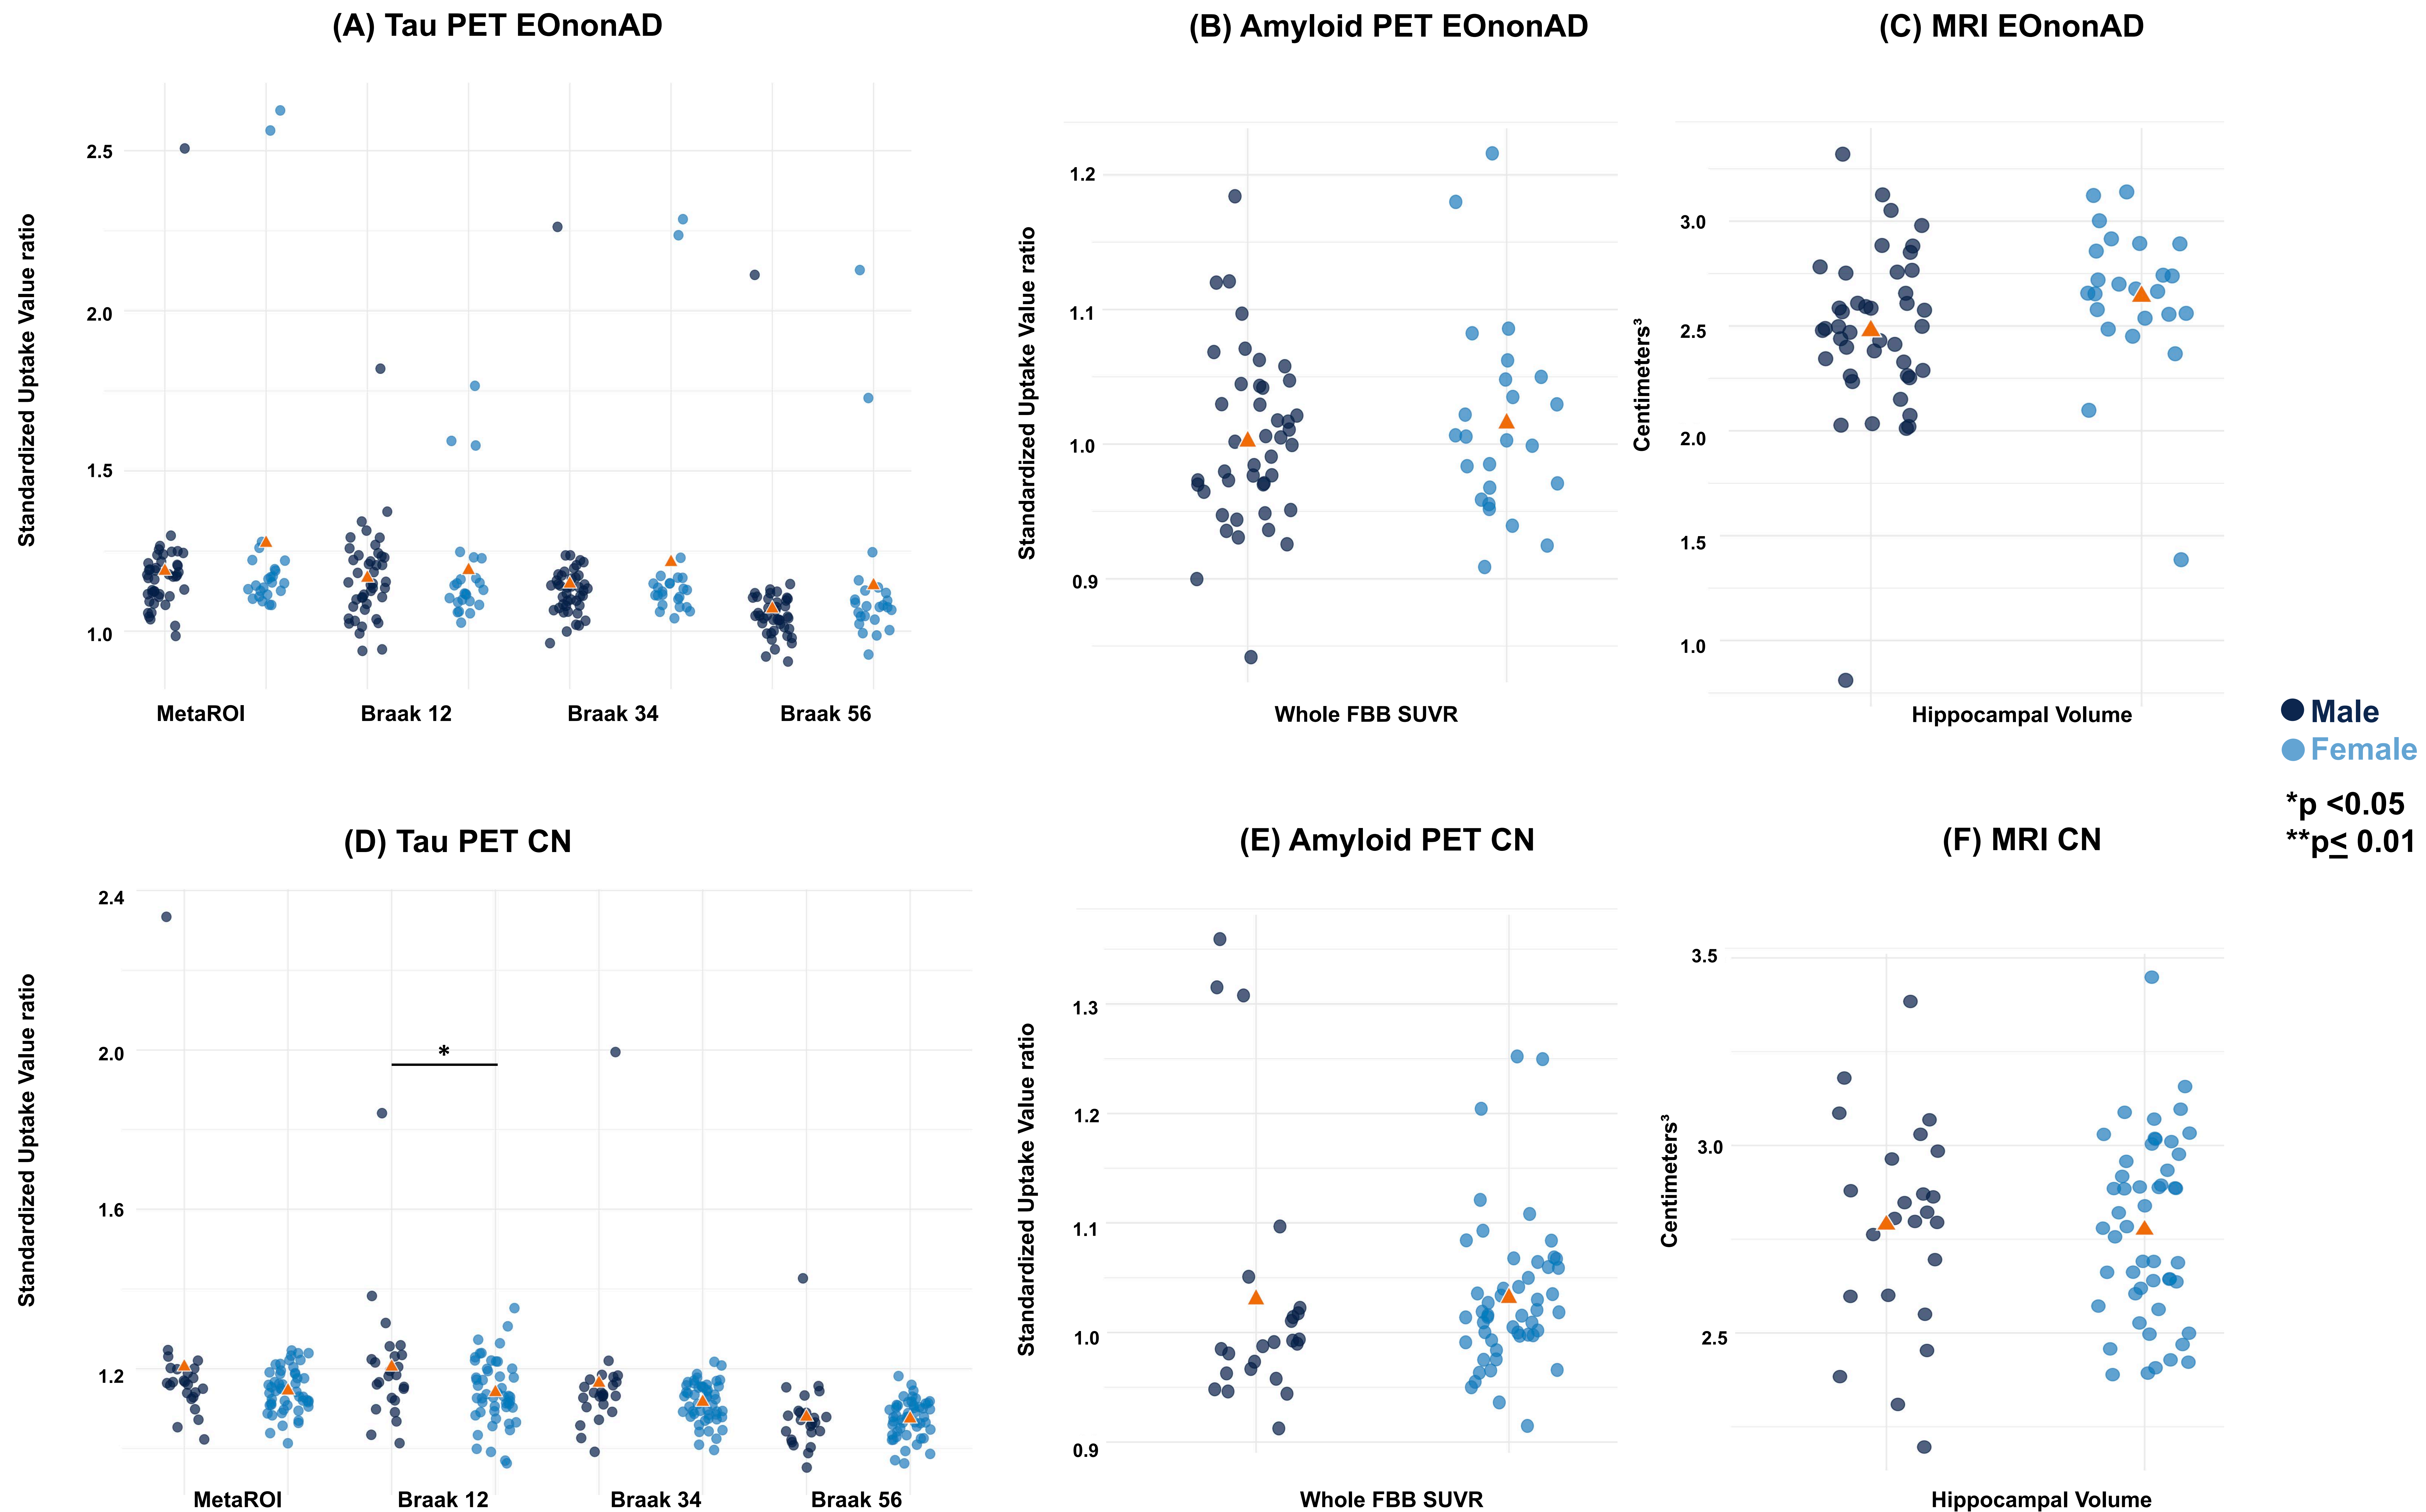

**Supplementary Figure 1. Sex Differences.** Imaging biomarker measures comparing males and females: (A) EOnonAD tau uptake measures, (B) EOnonAD global amyloid uptake, (C) EOnonAD hippocampal volume, (D) CN tau uptake measures, (E) CN global amyloid uptake, (F) CN hippocampal volume.
