# Supplementary material
Source: PubMed Central journal article supplement (PMC10811272)
Supplement: NIHMS1916618-supplement-Fig_S2.pdf [file NIHMS1916618-supplement-Fig_S2.pdf]

**(A) MRI EOAD *APOE-ε4*- vs. *APOE-ε4*+**

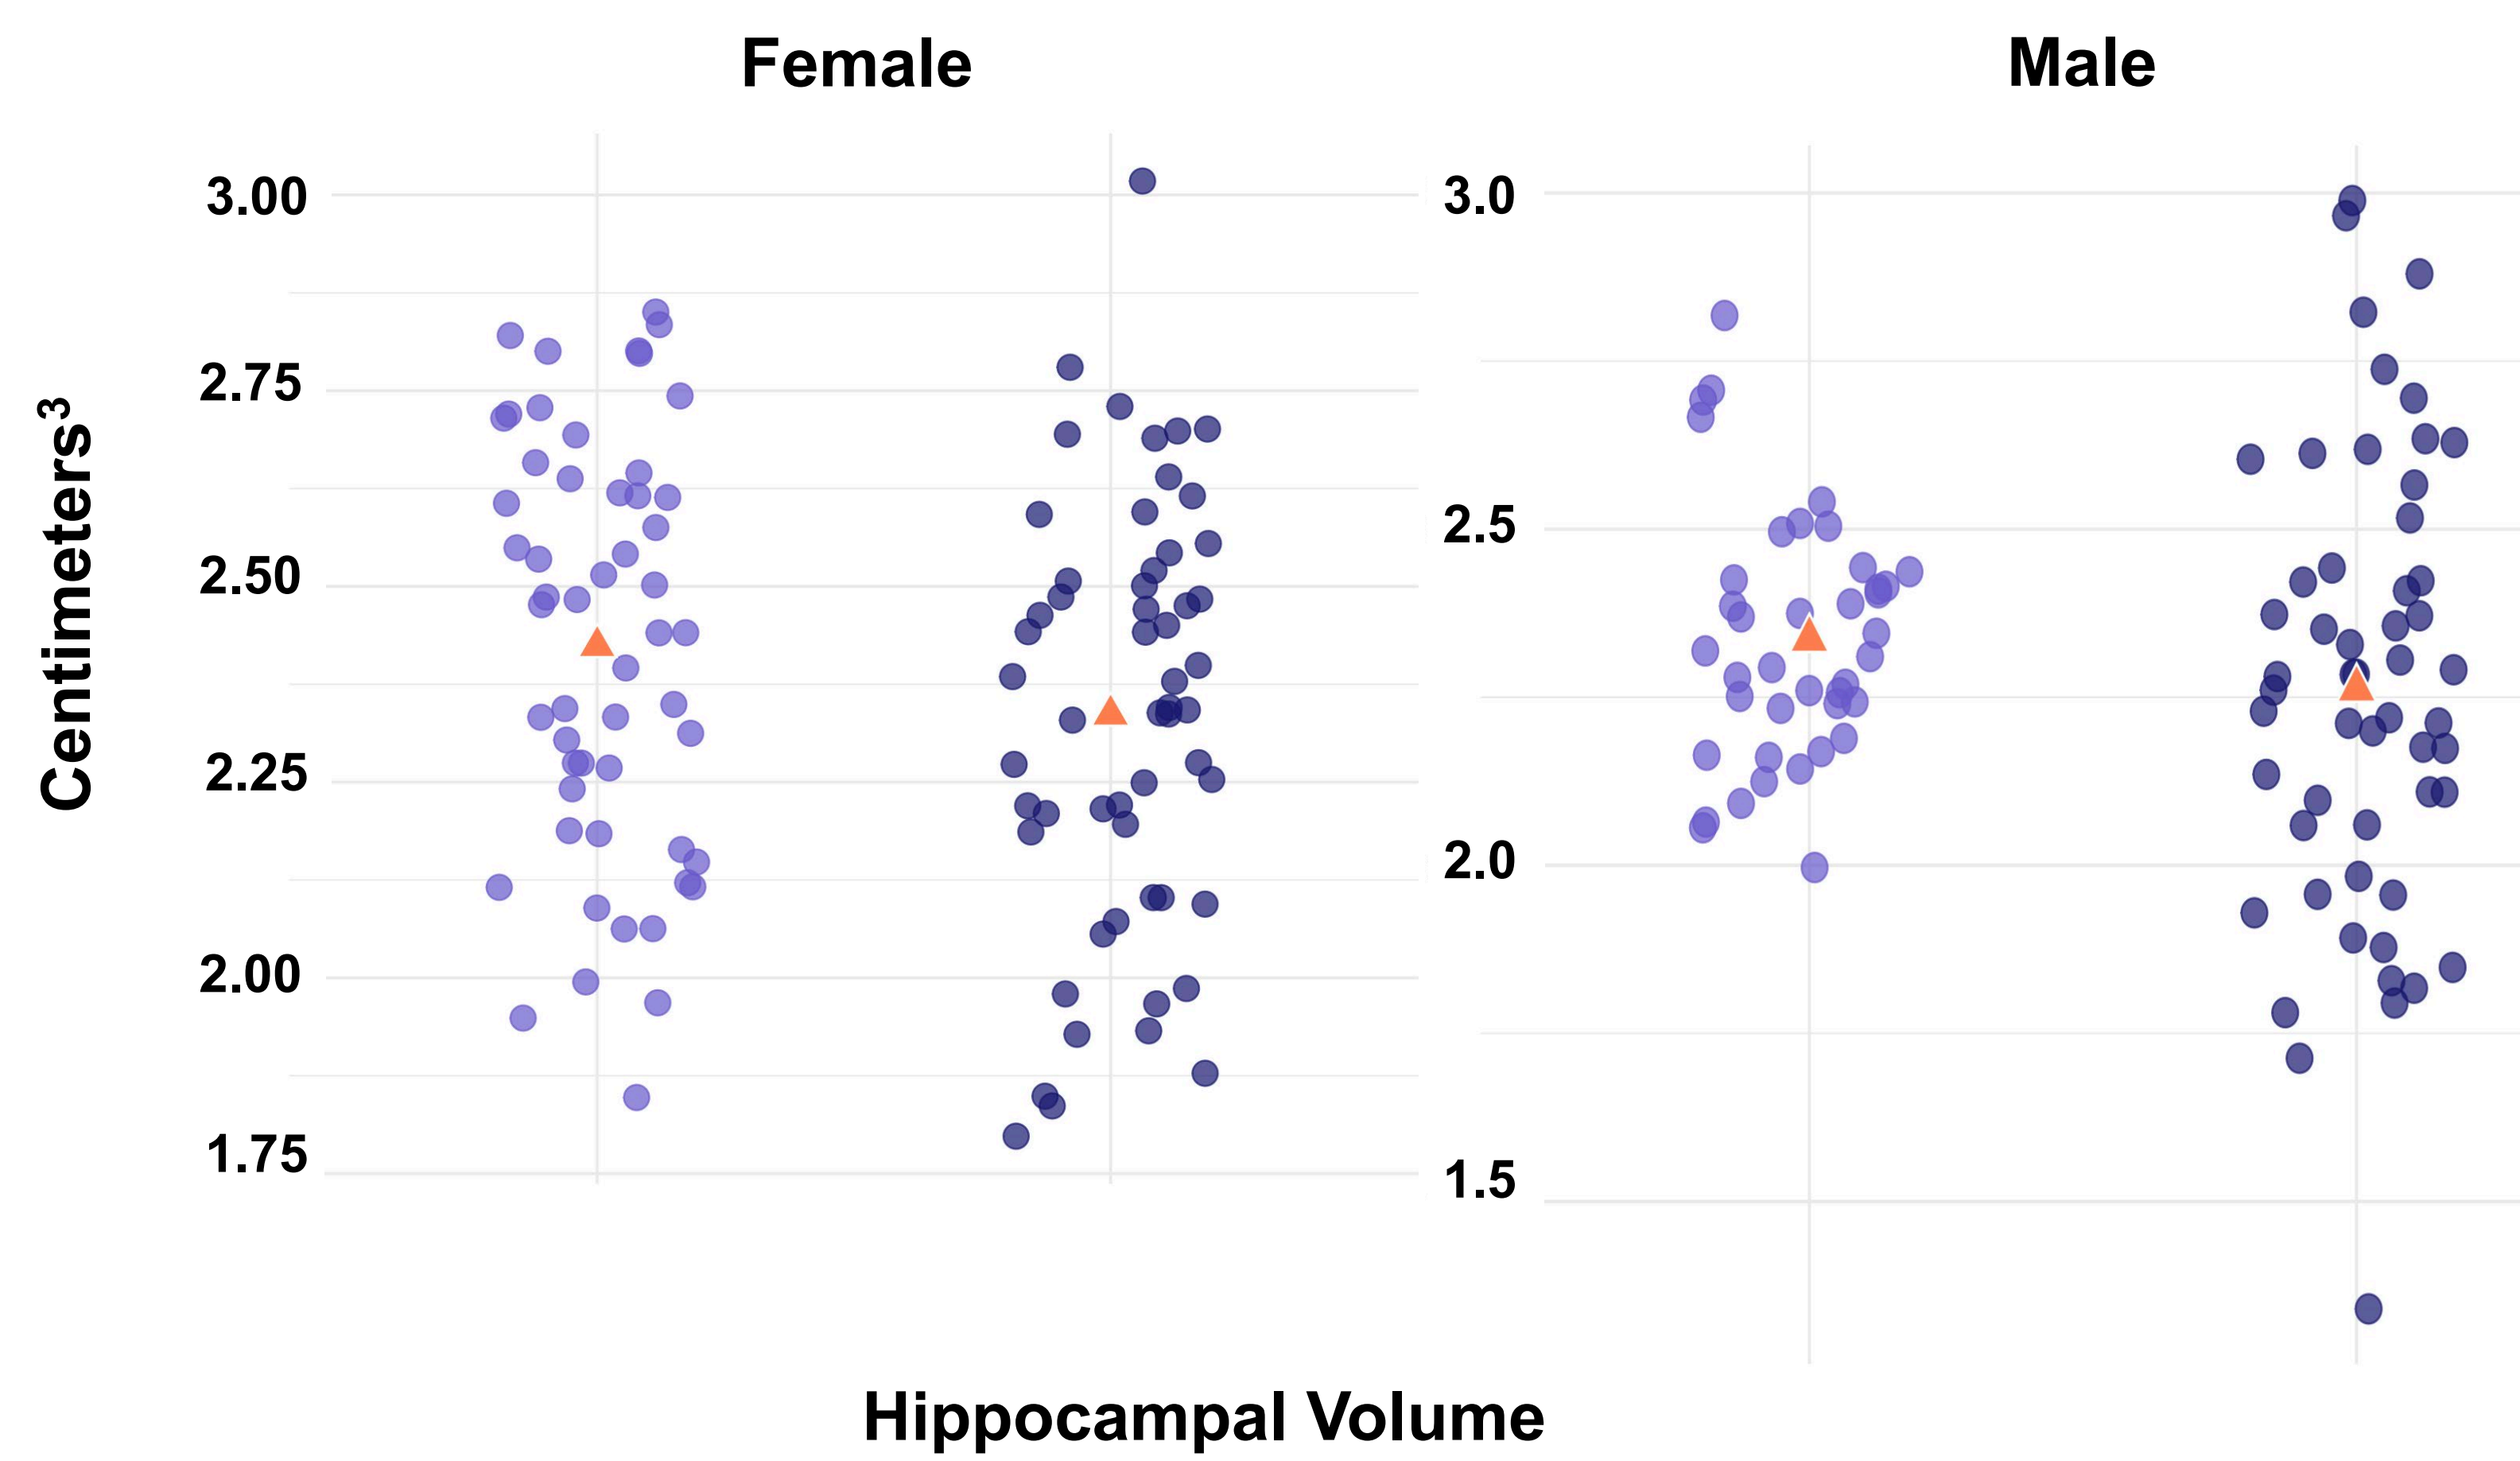

**(B) Amyloid PET EOAD *APOE-ε4*- vs. *APOE-ε4*+**

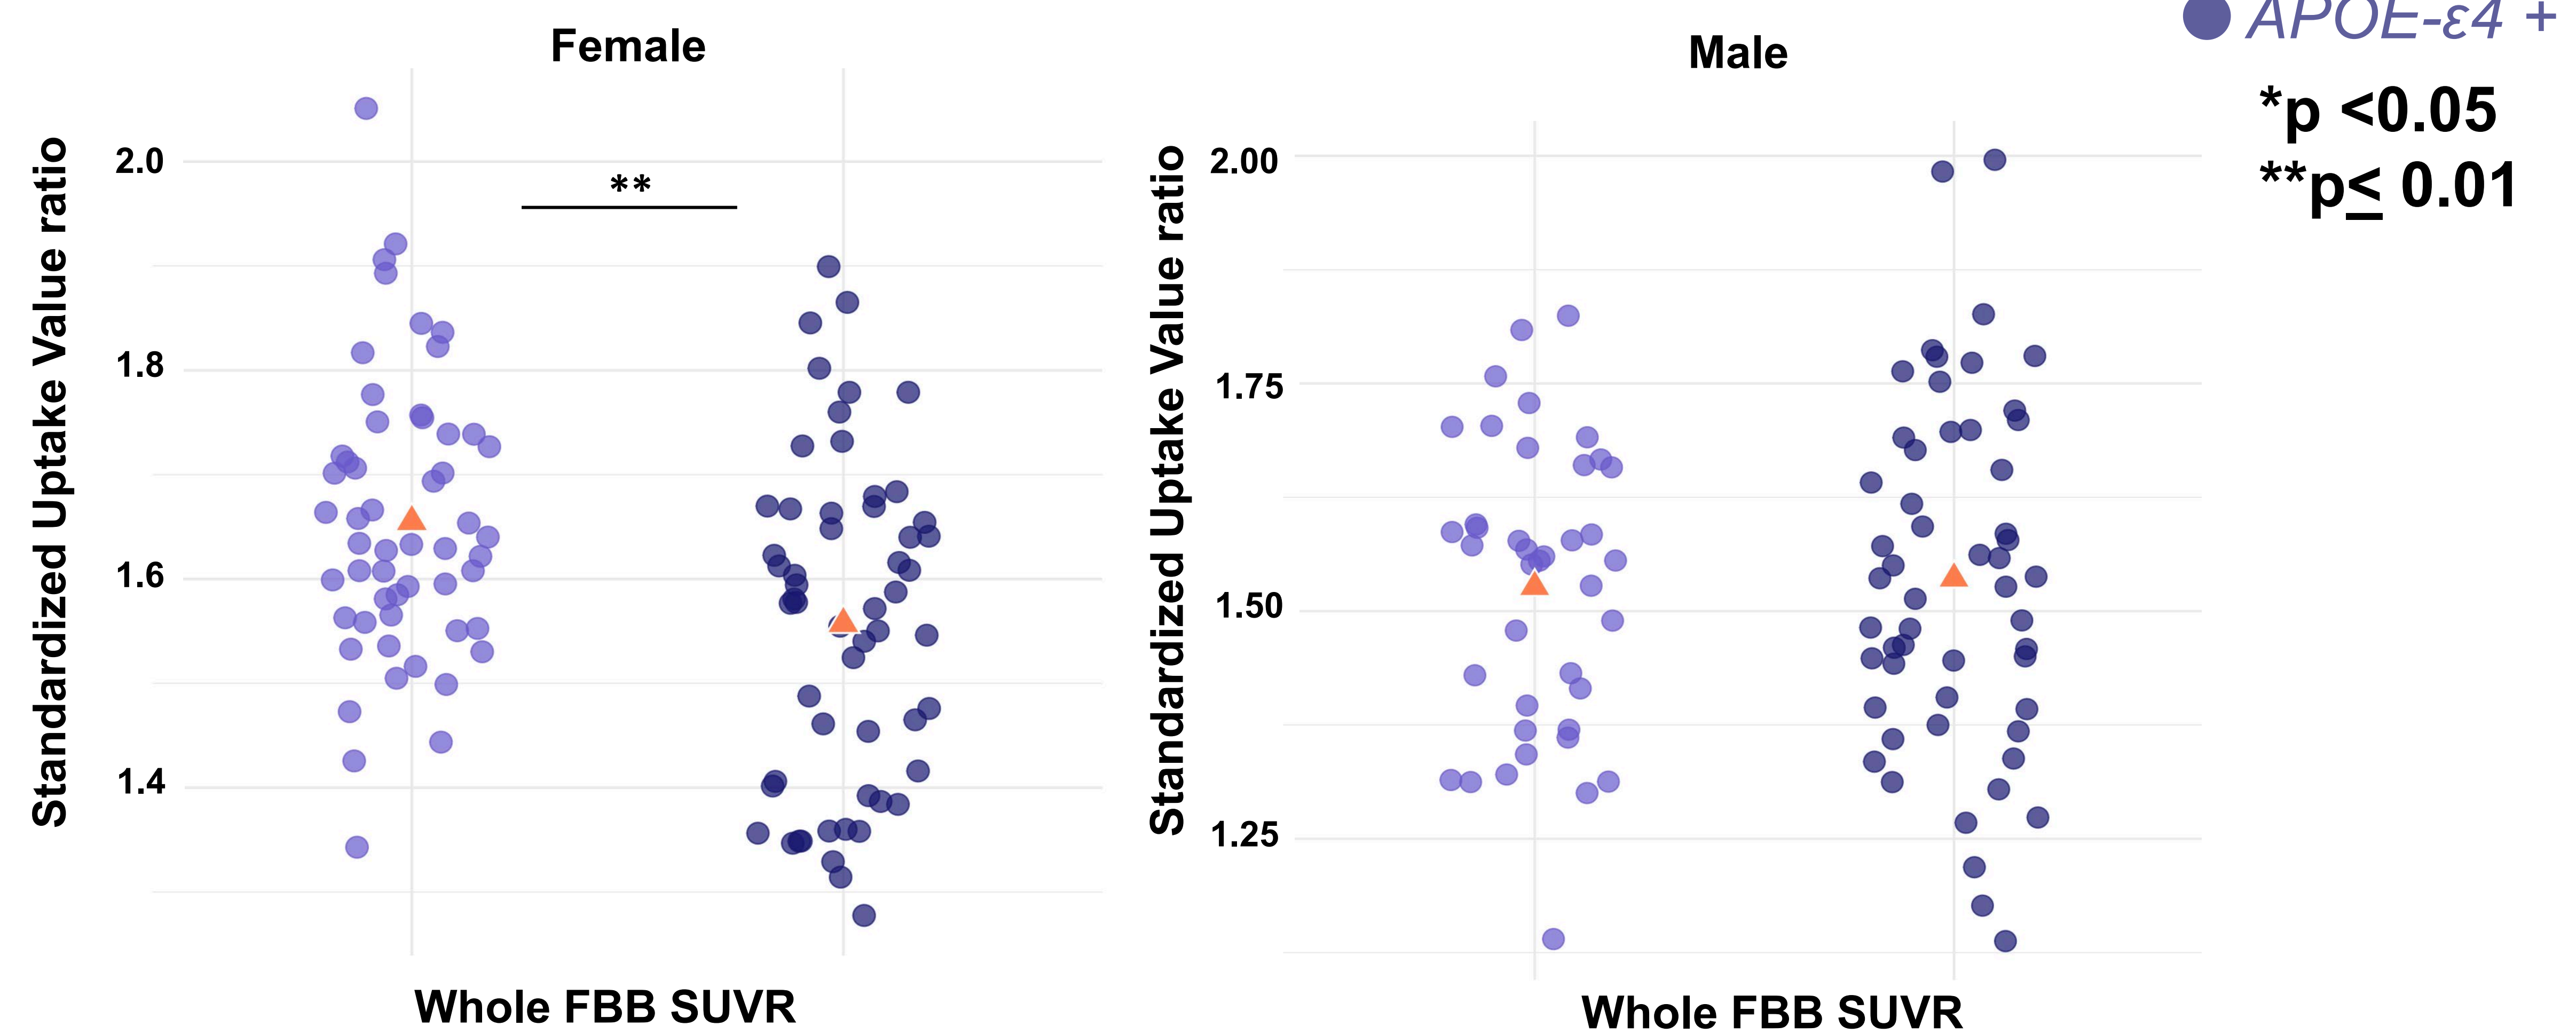

**(C) MRI EOnonAD *APOE-ε4*- vs. *APOE-ε4*+**

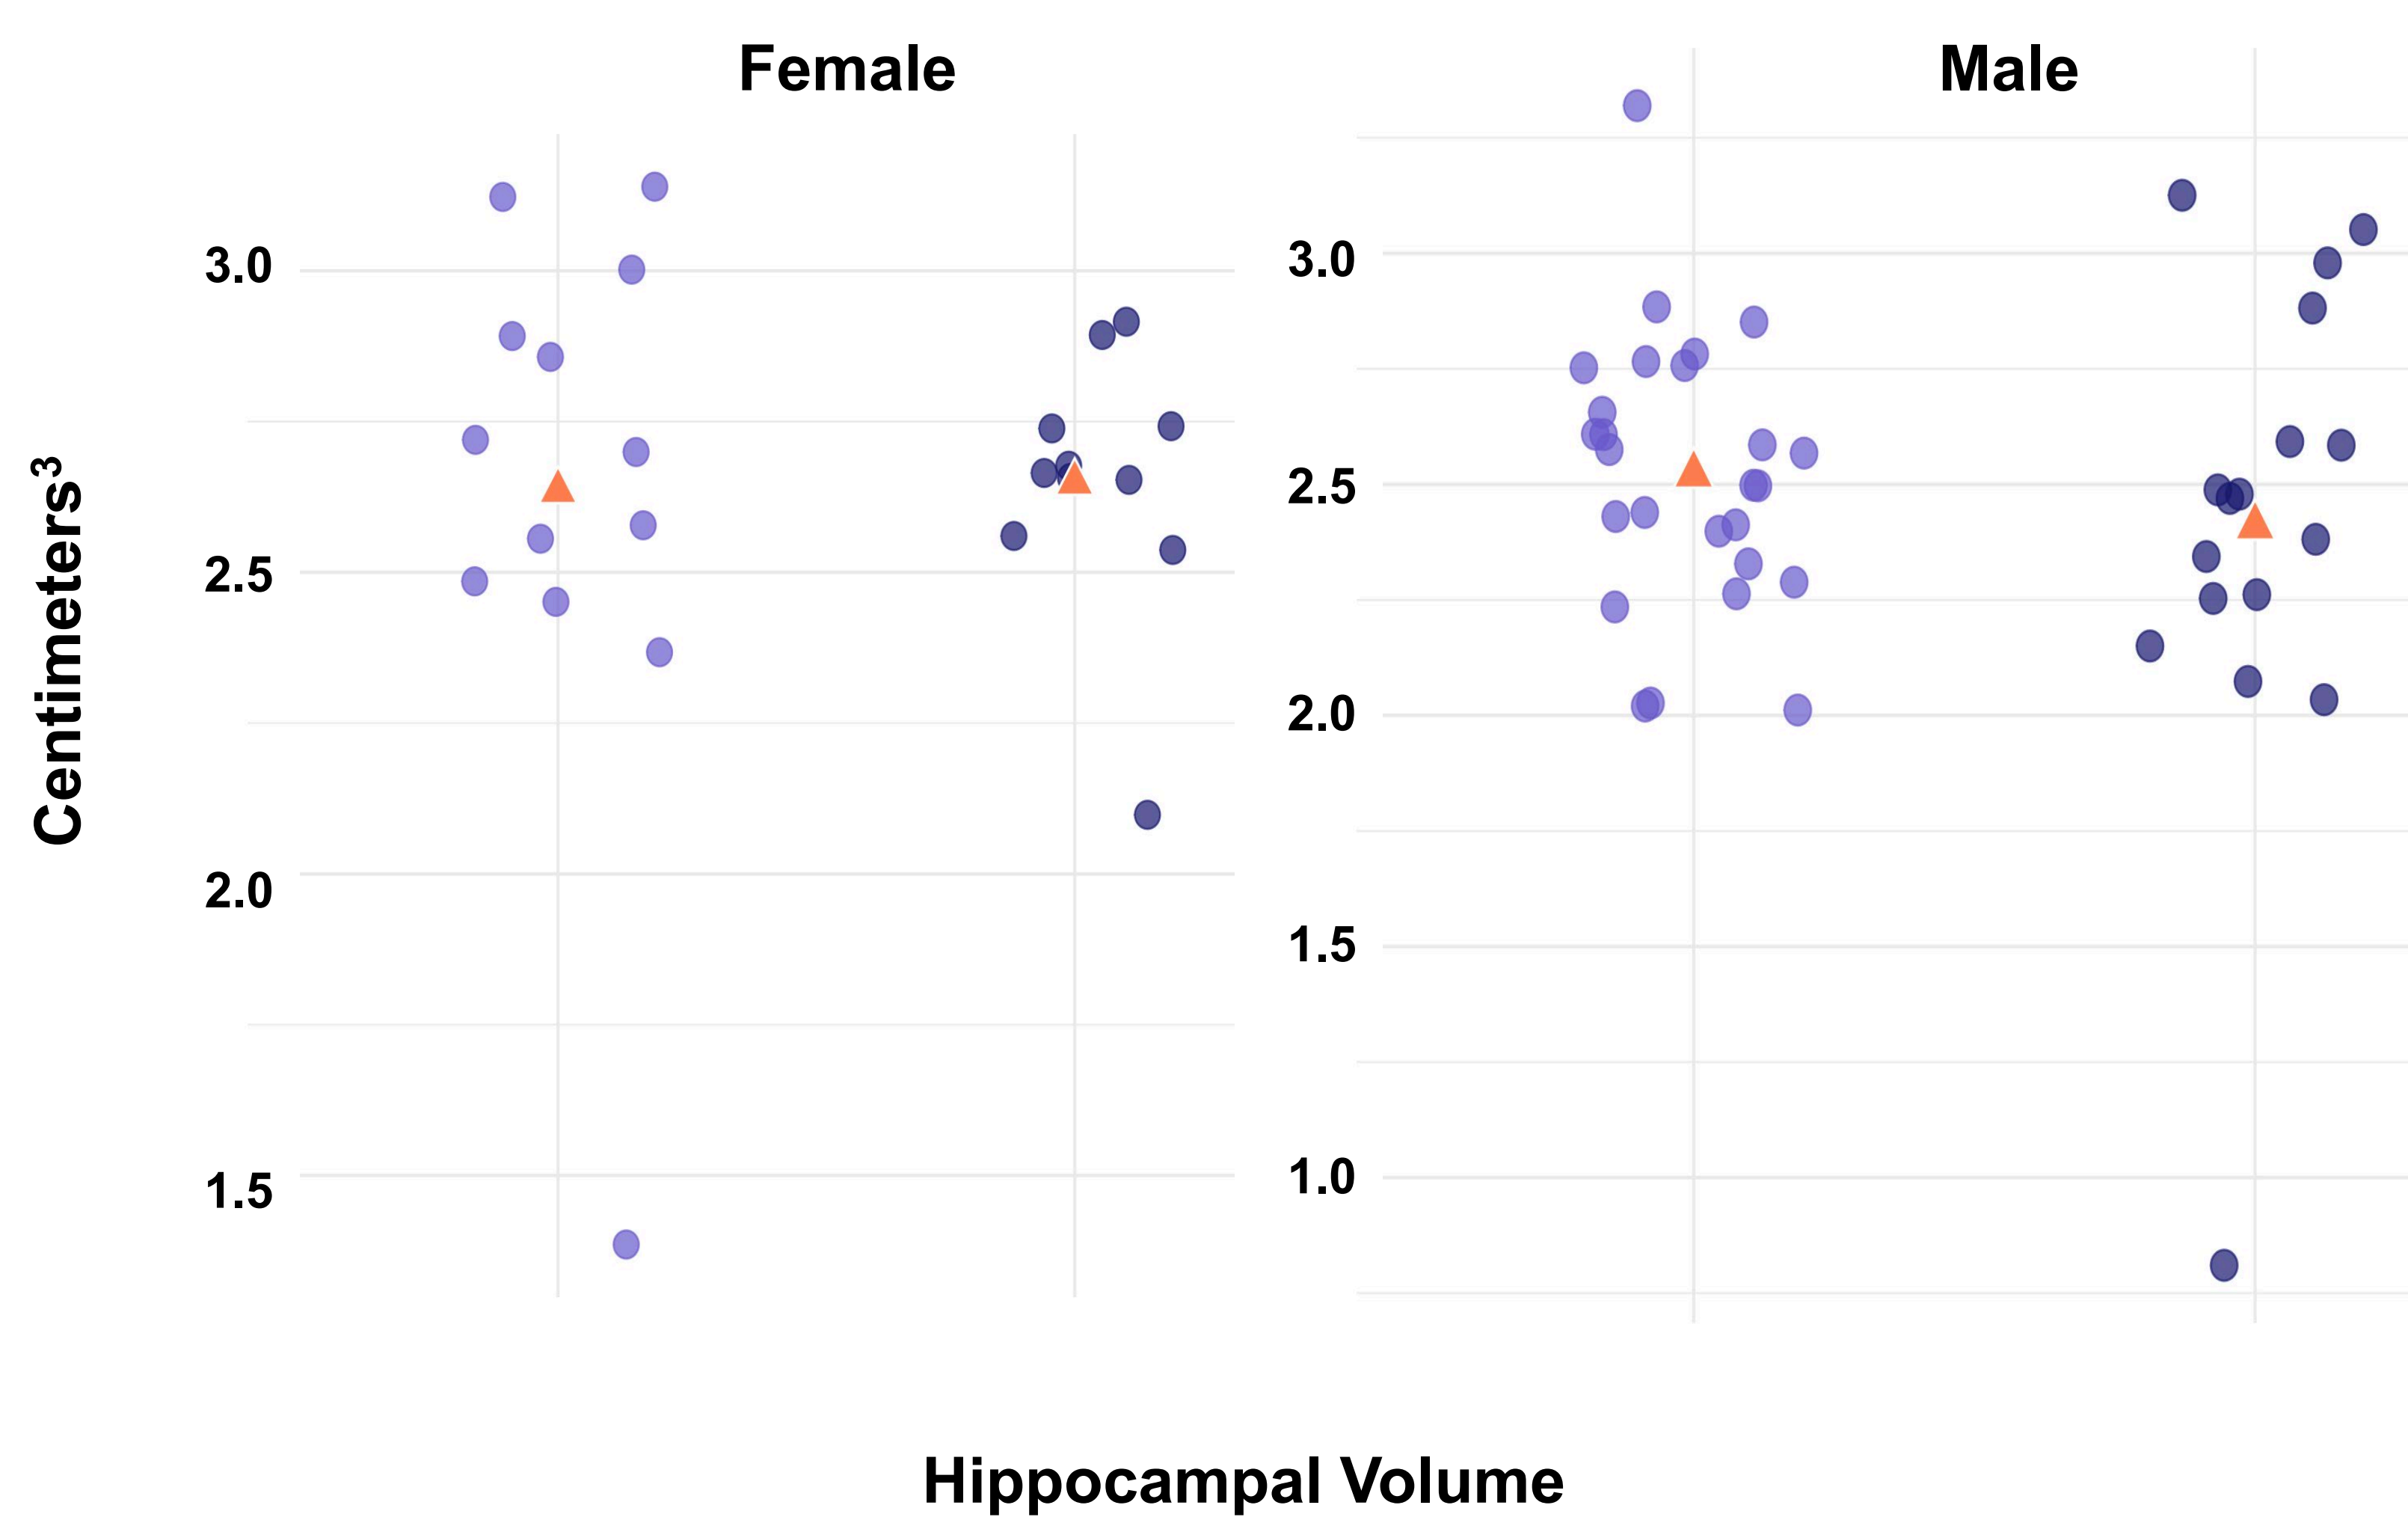

**(D) Amyloid PET EOnonAD *APOE-ε4*- vs. *APOE-ε4*+**

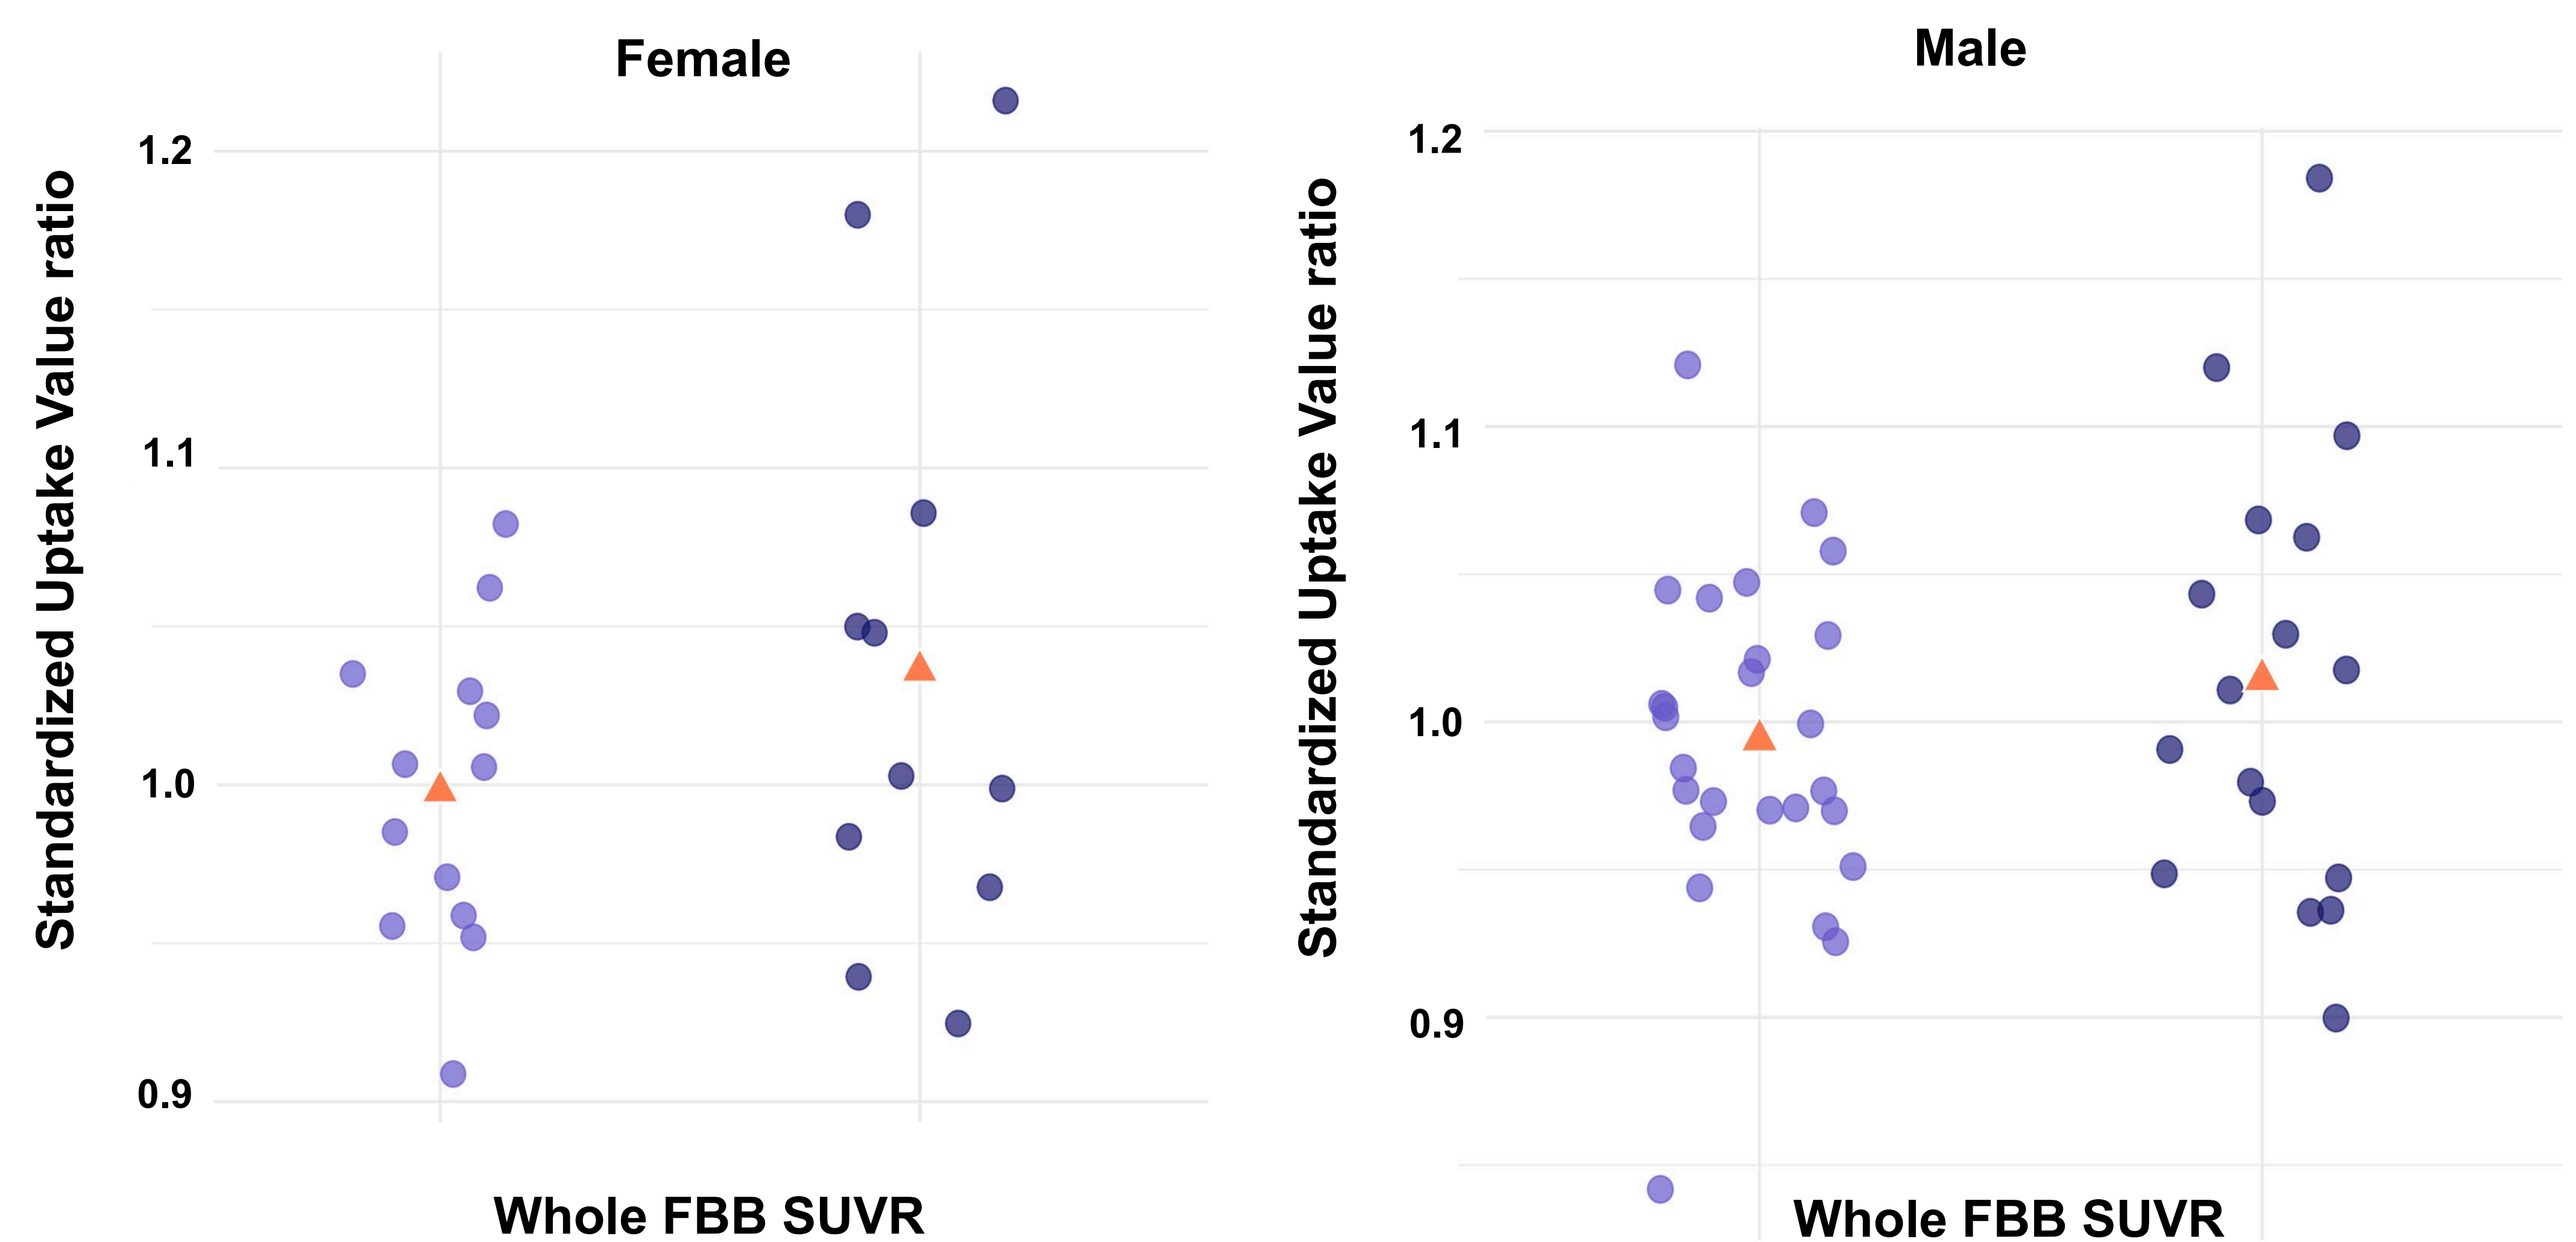

**(E) MRI CN *APOE-ε4*- vs. *APOE-ε4*+**

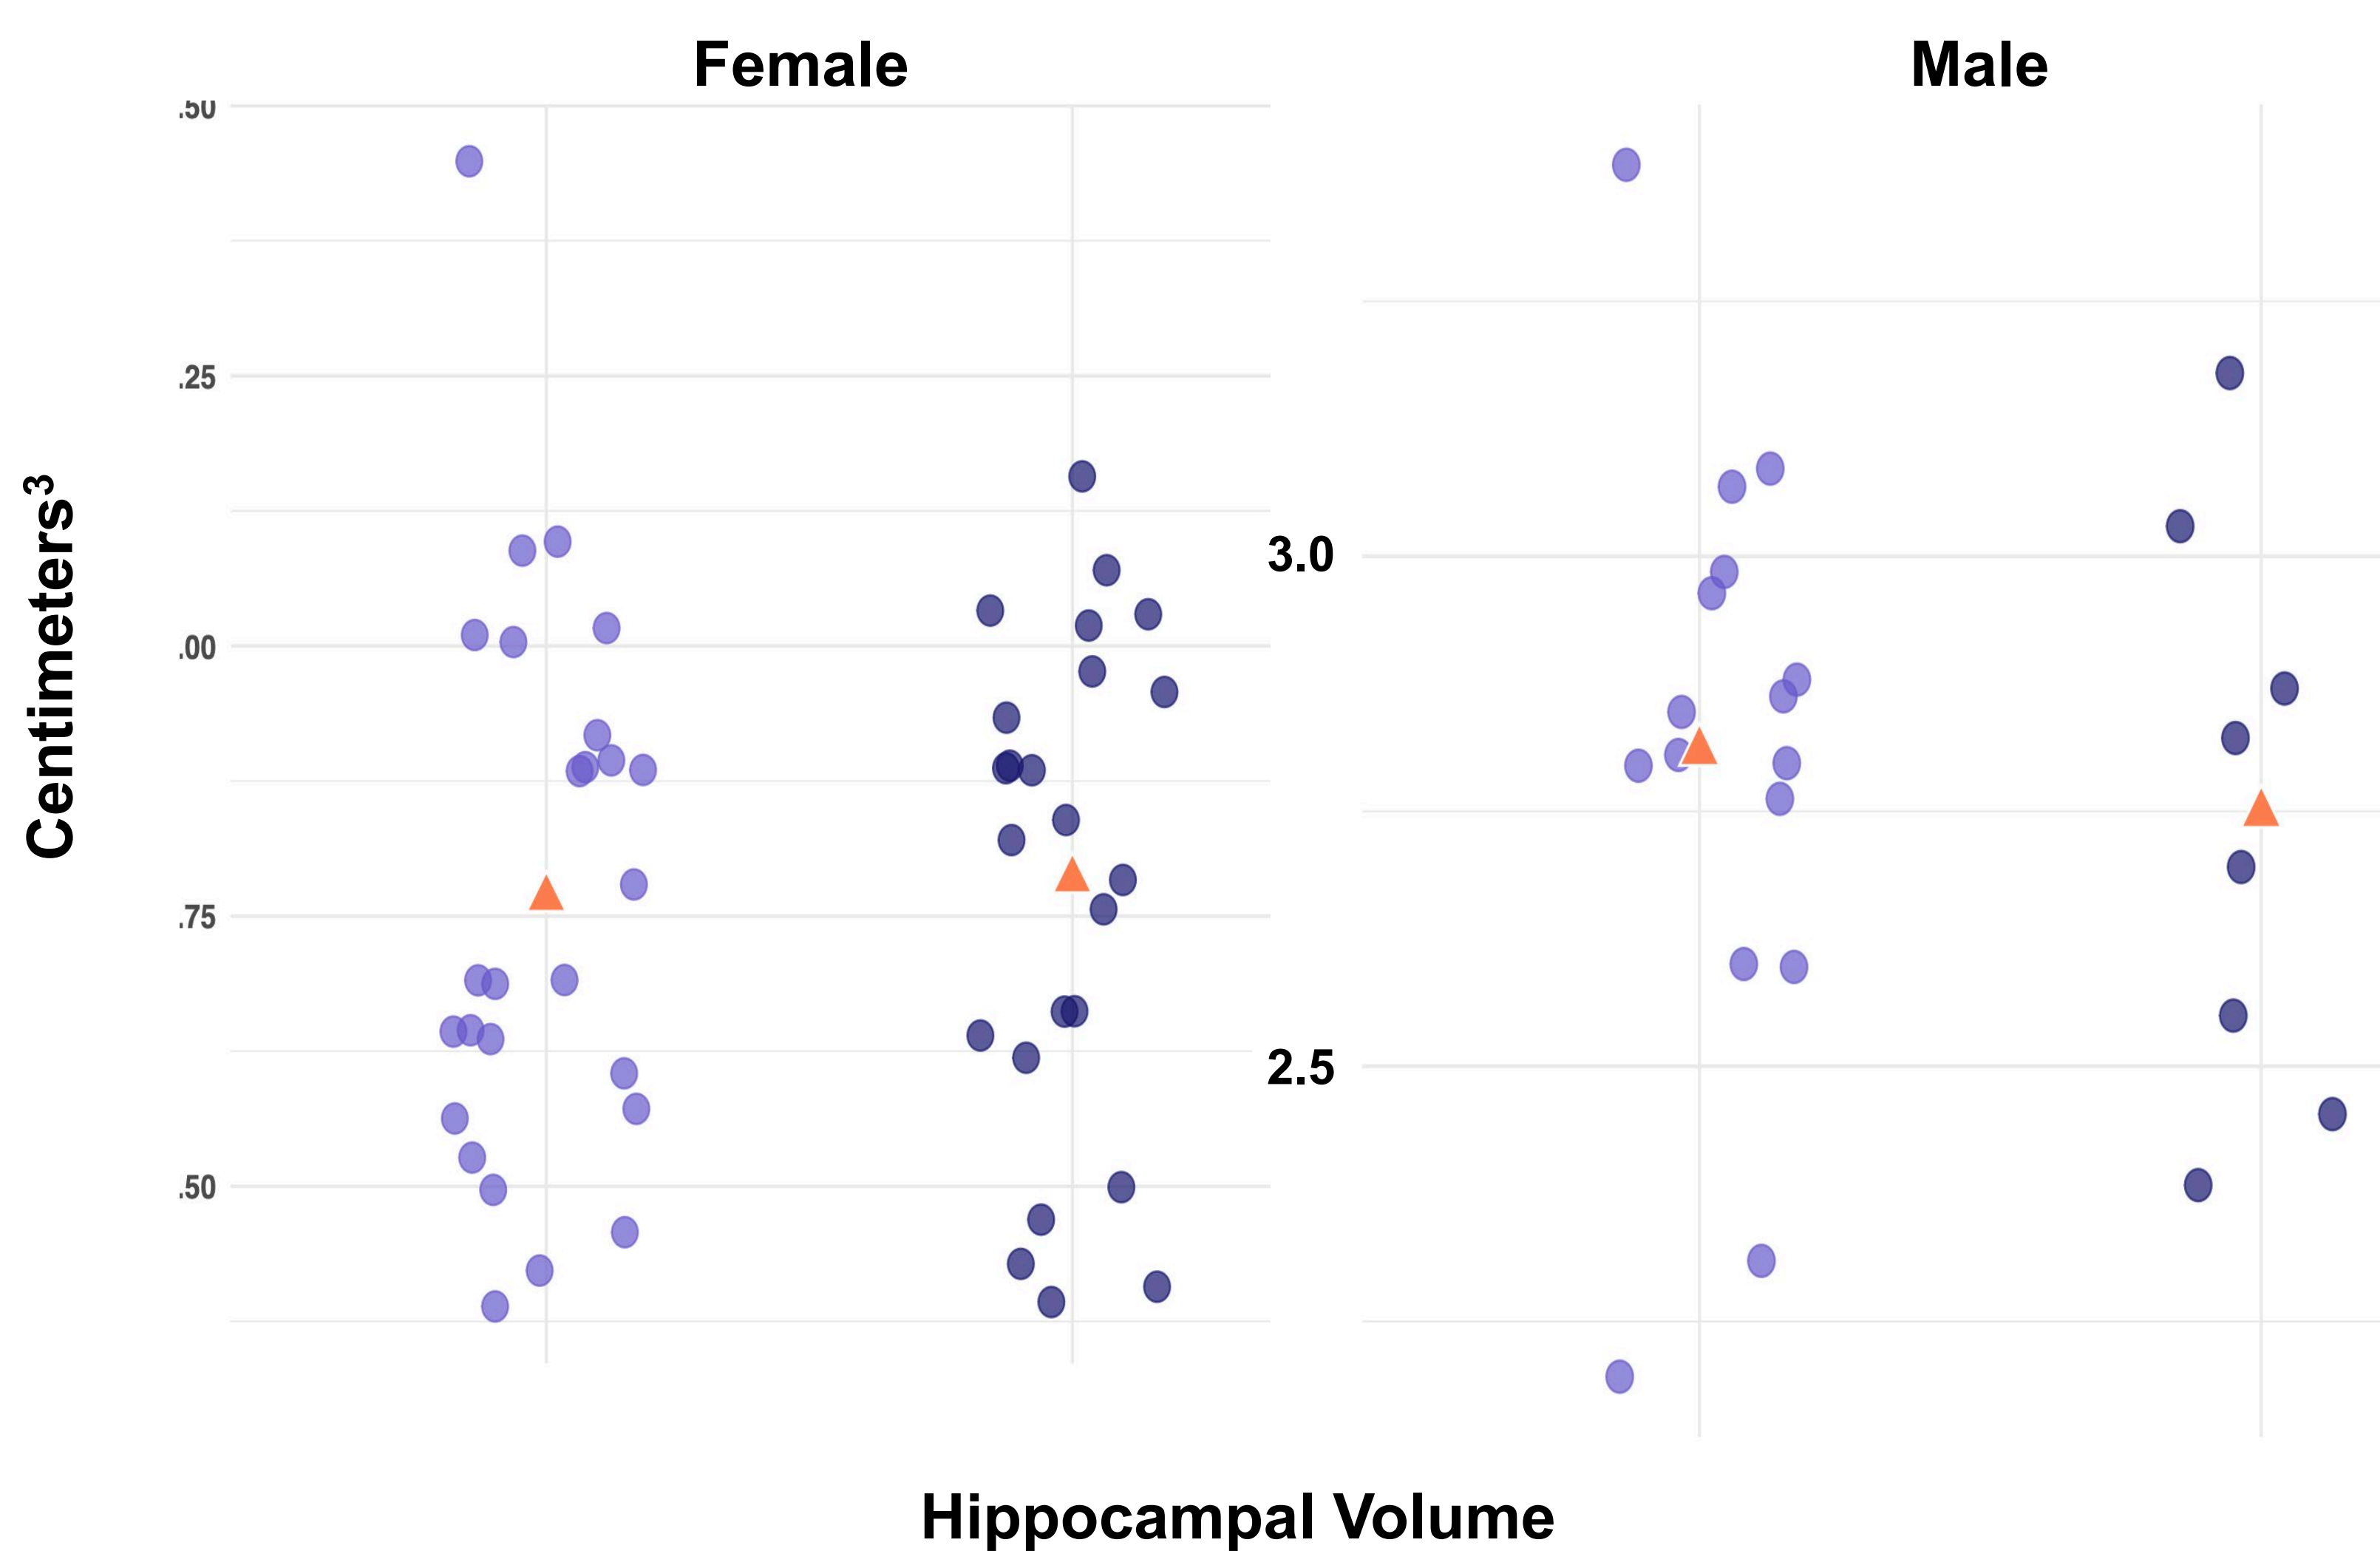

**(F) Amyloid PET CN *APOE-ε4*- vs. *APOE-ε4*+**

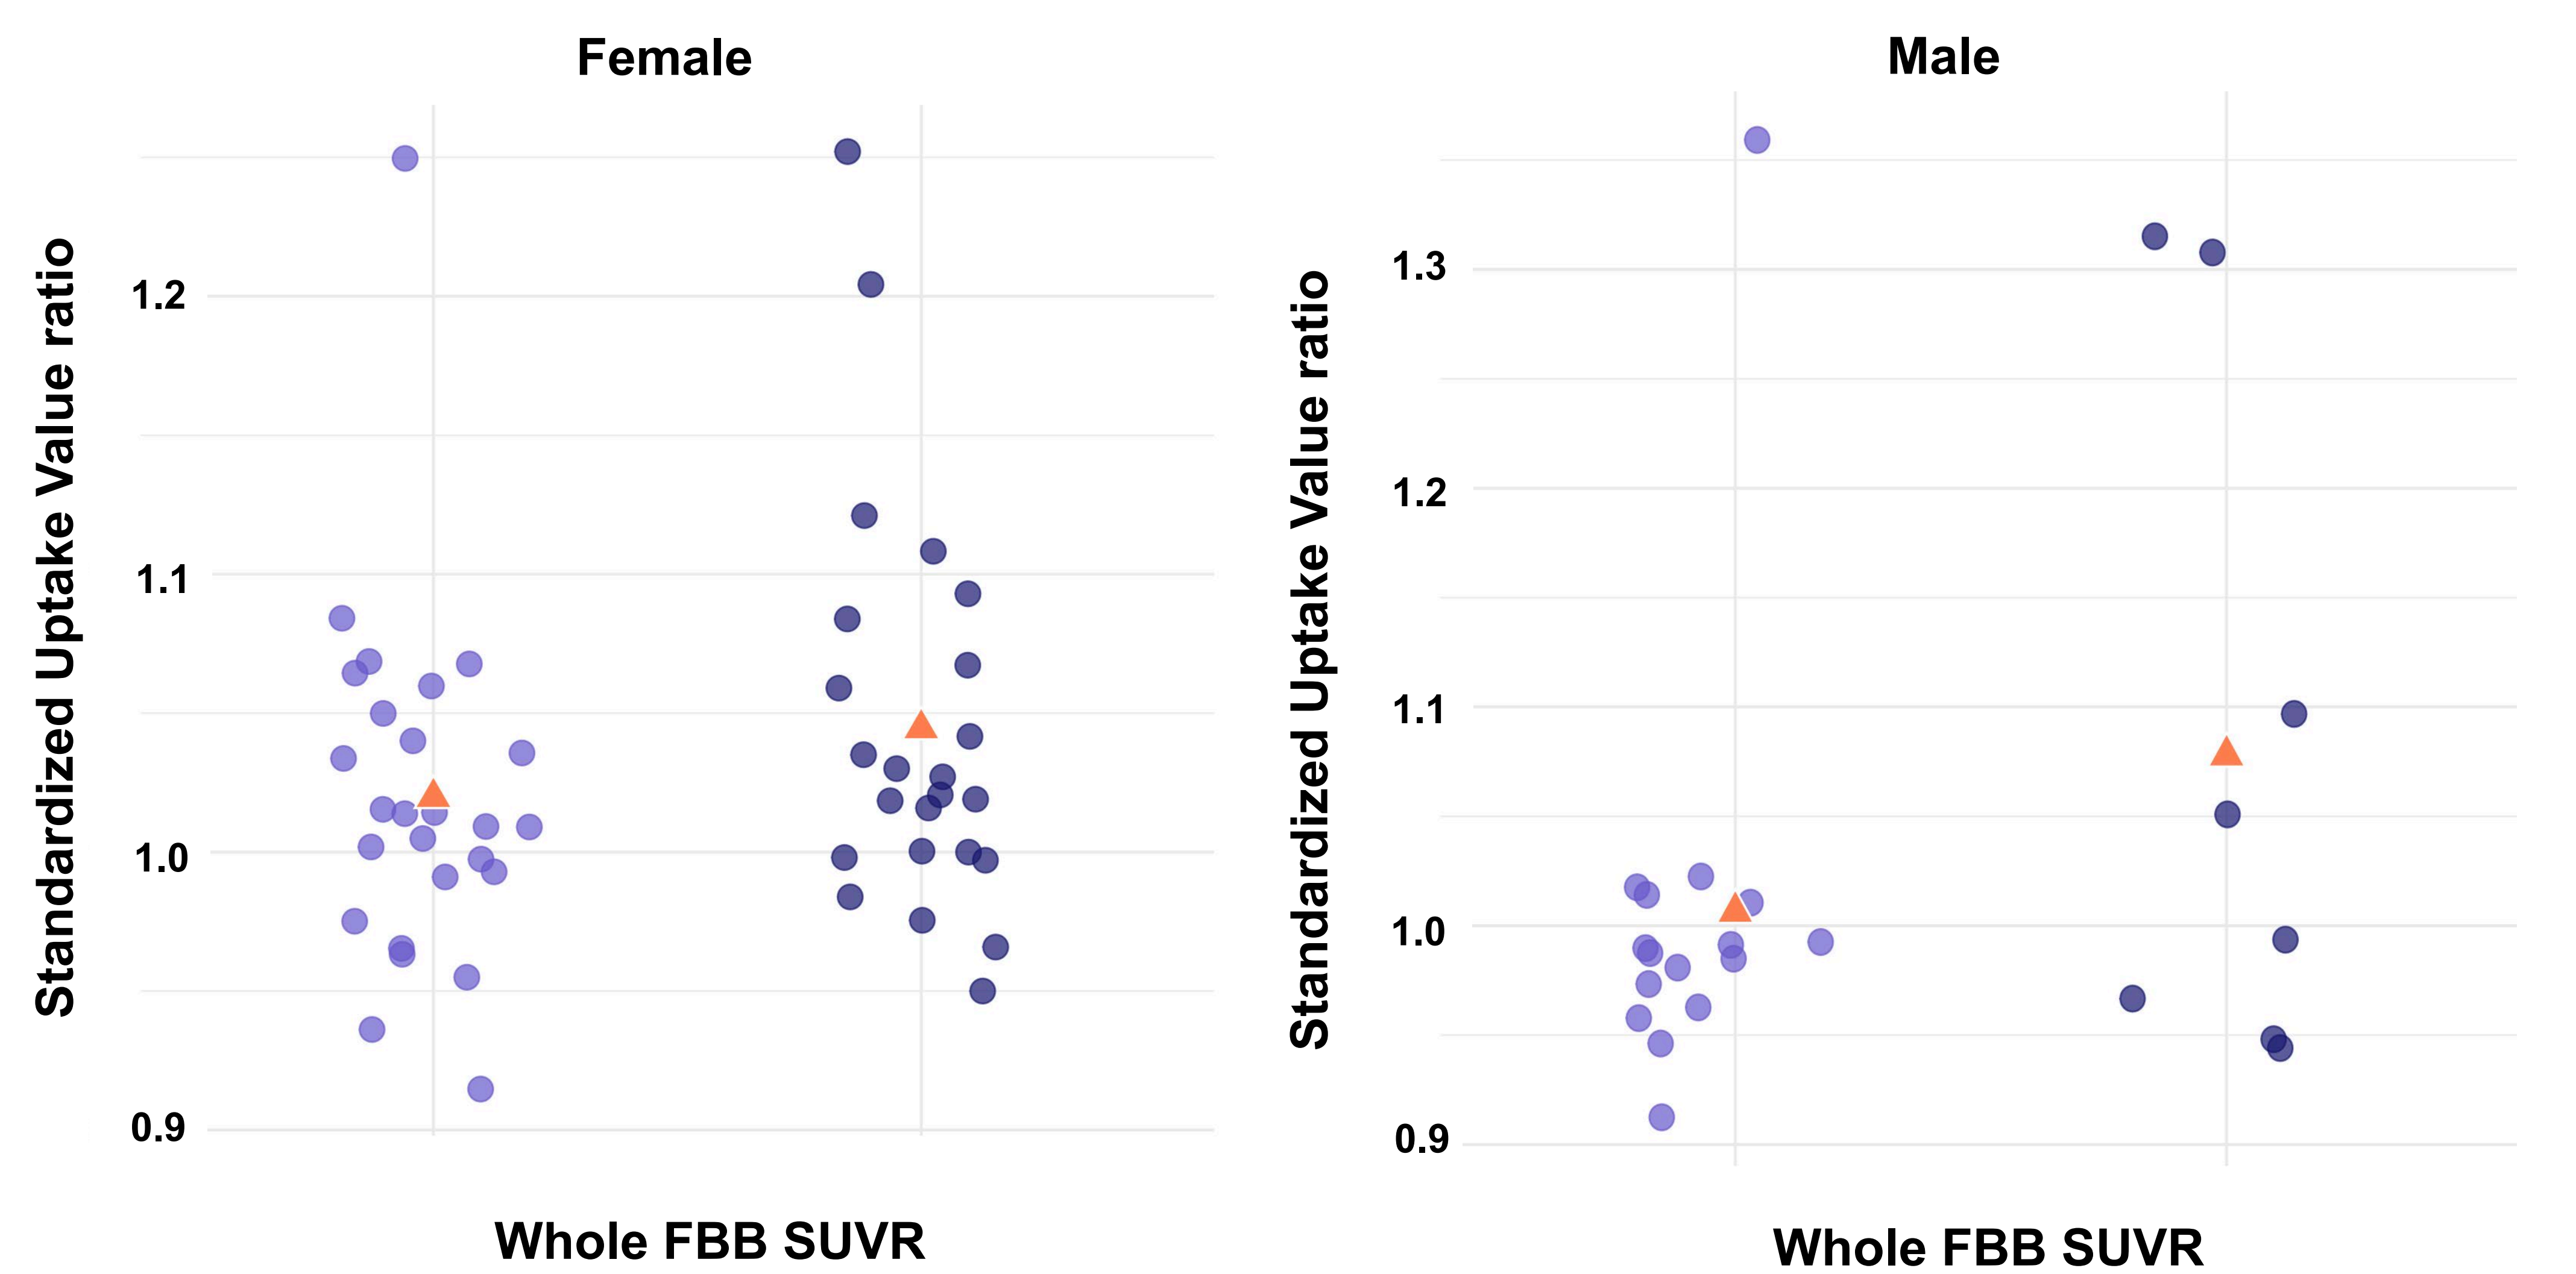

**Supplementary Figure 2.** Sex stratified by *APOE-ε4* carrier status. Imaging biomarker measures comparing *APOE-ε4* male carriers (+) vs. male non-carriers (-) and *APOE-ε4* female carriers (+) vs. female non-carriers (-): (A) EOAD hippocampal volume (B) EOAD global amyloid uptake (C) EOnonAD hippocampal volume (D) EOnonAD global amyloid uptake (E) CN hippocampal volume (F) CN global amyloid uptake.
