# Supplementary material
Source: PubMed Central journal article supplement (PMC10811272)
Supplement: NIHMS1916618-supplement-Fig_S3.pdf [file NIHMS1916618-supplement-Fig_S3.pdf]

(A) Tau PET EOAD *APOE-ε4-* vs. *APOE-ε4+*

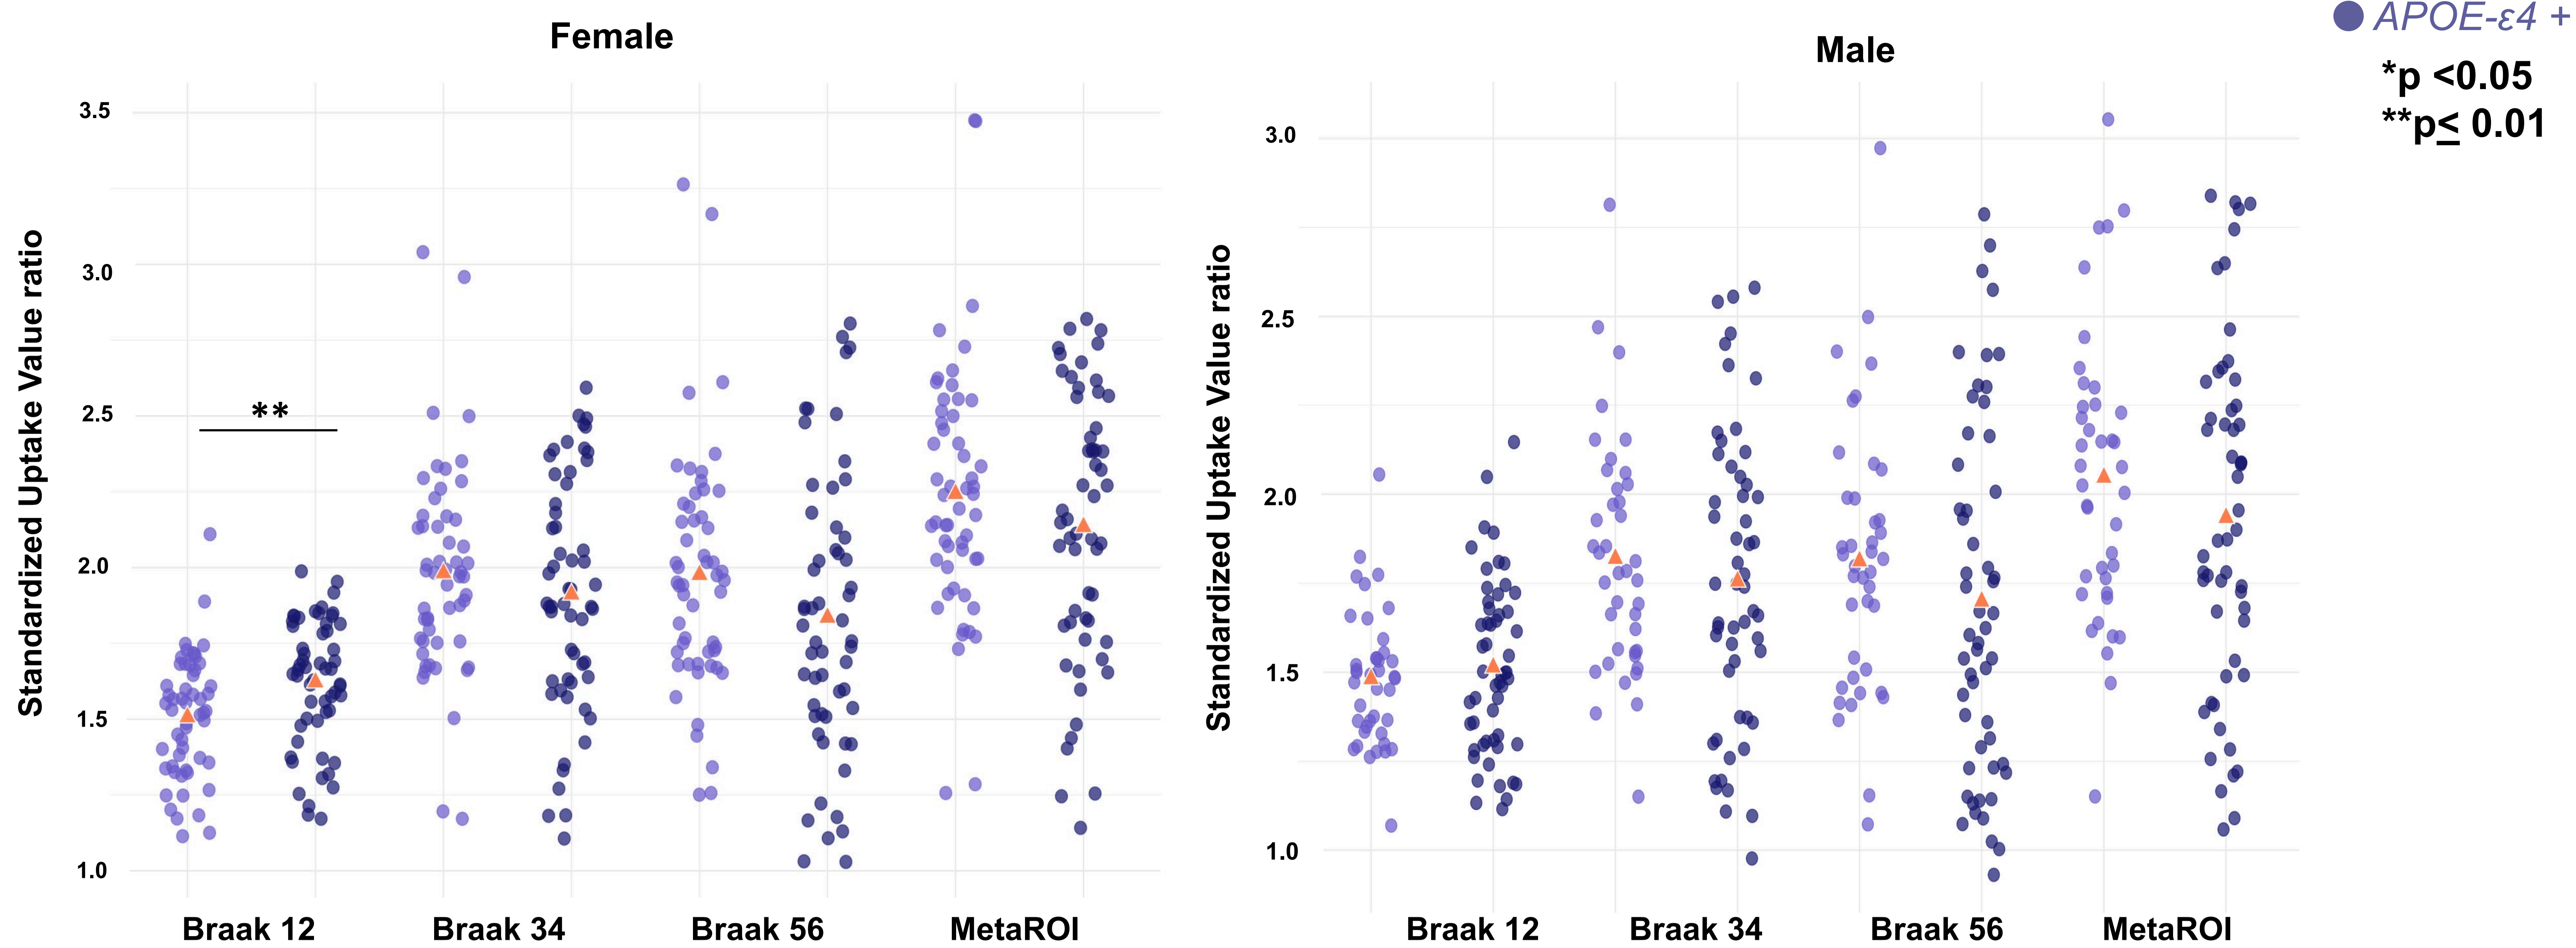

(B) Tau PET EOnonAD *APOE-ε4-* vs. *APOE-ε4+*

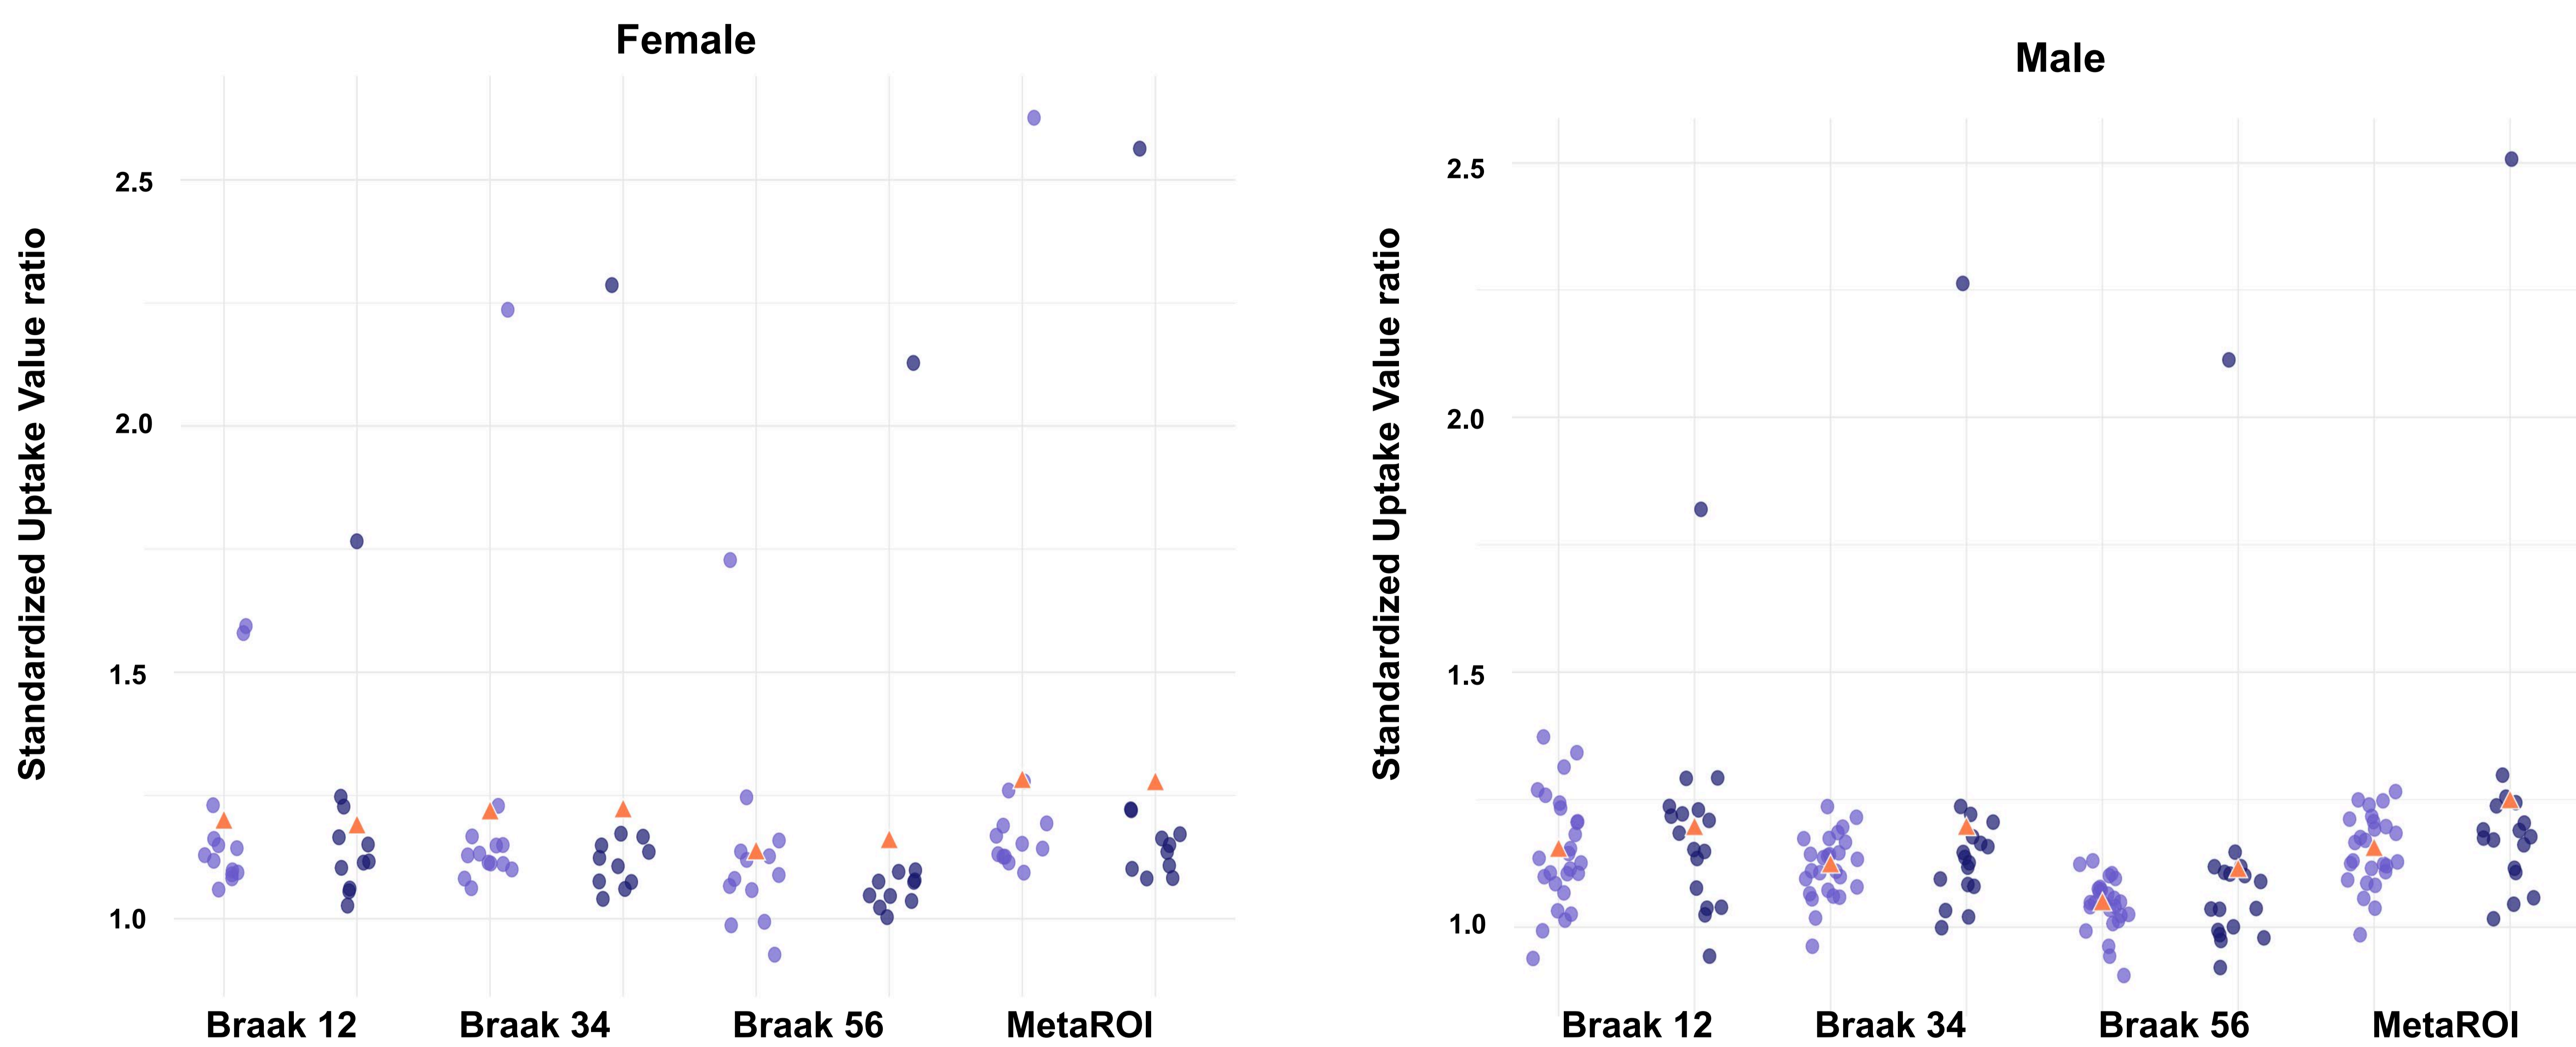

(C) Tau PET CN *APOE-ε4-* vs. *APOE-ε4+*

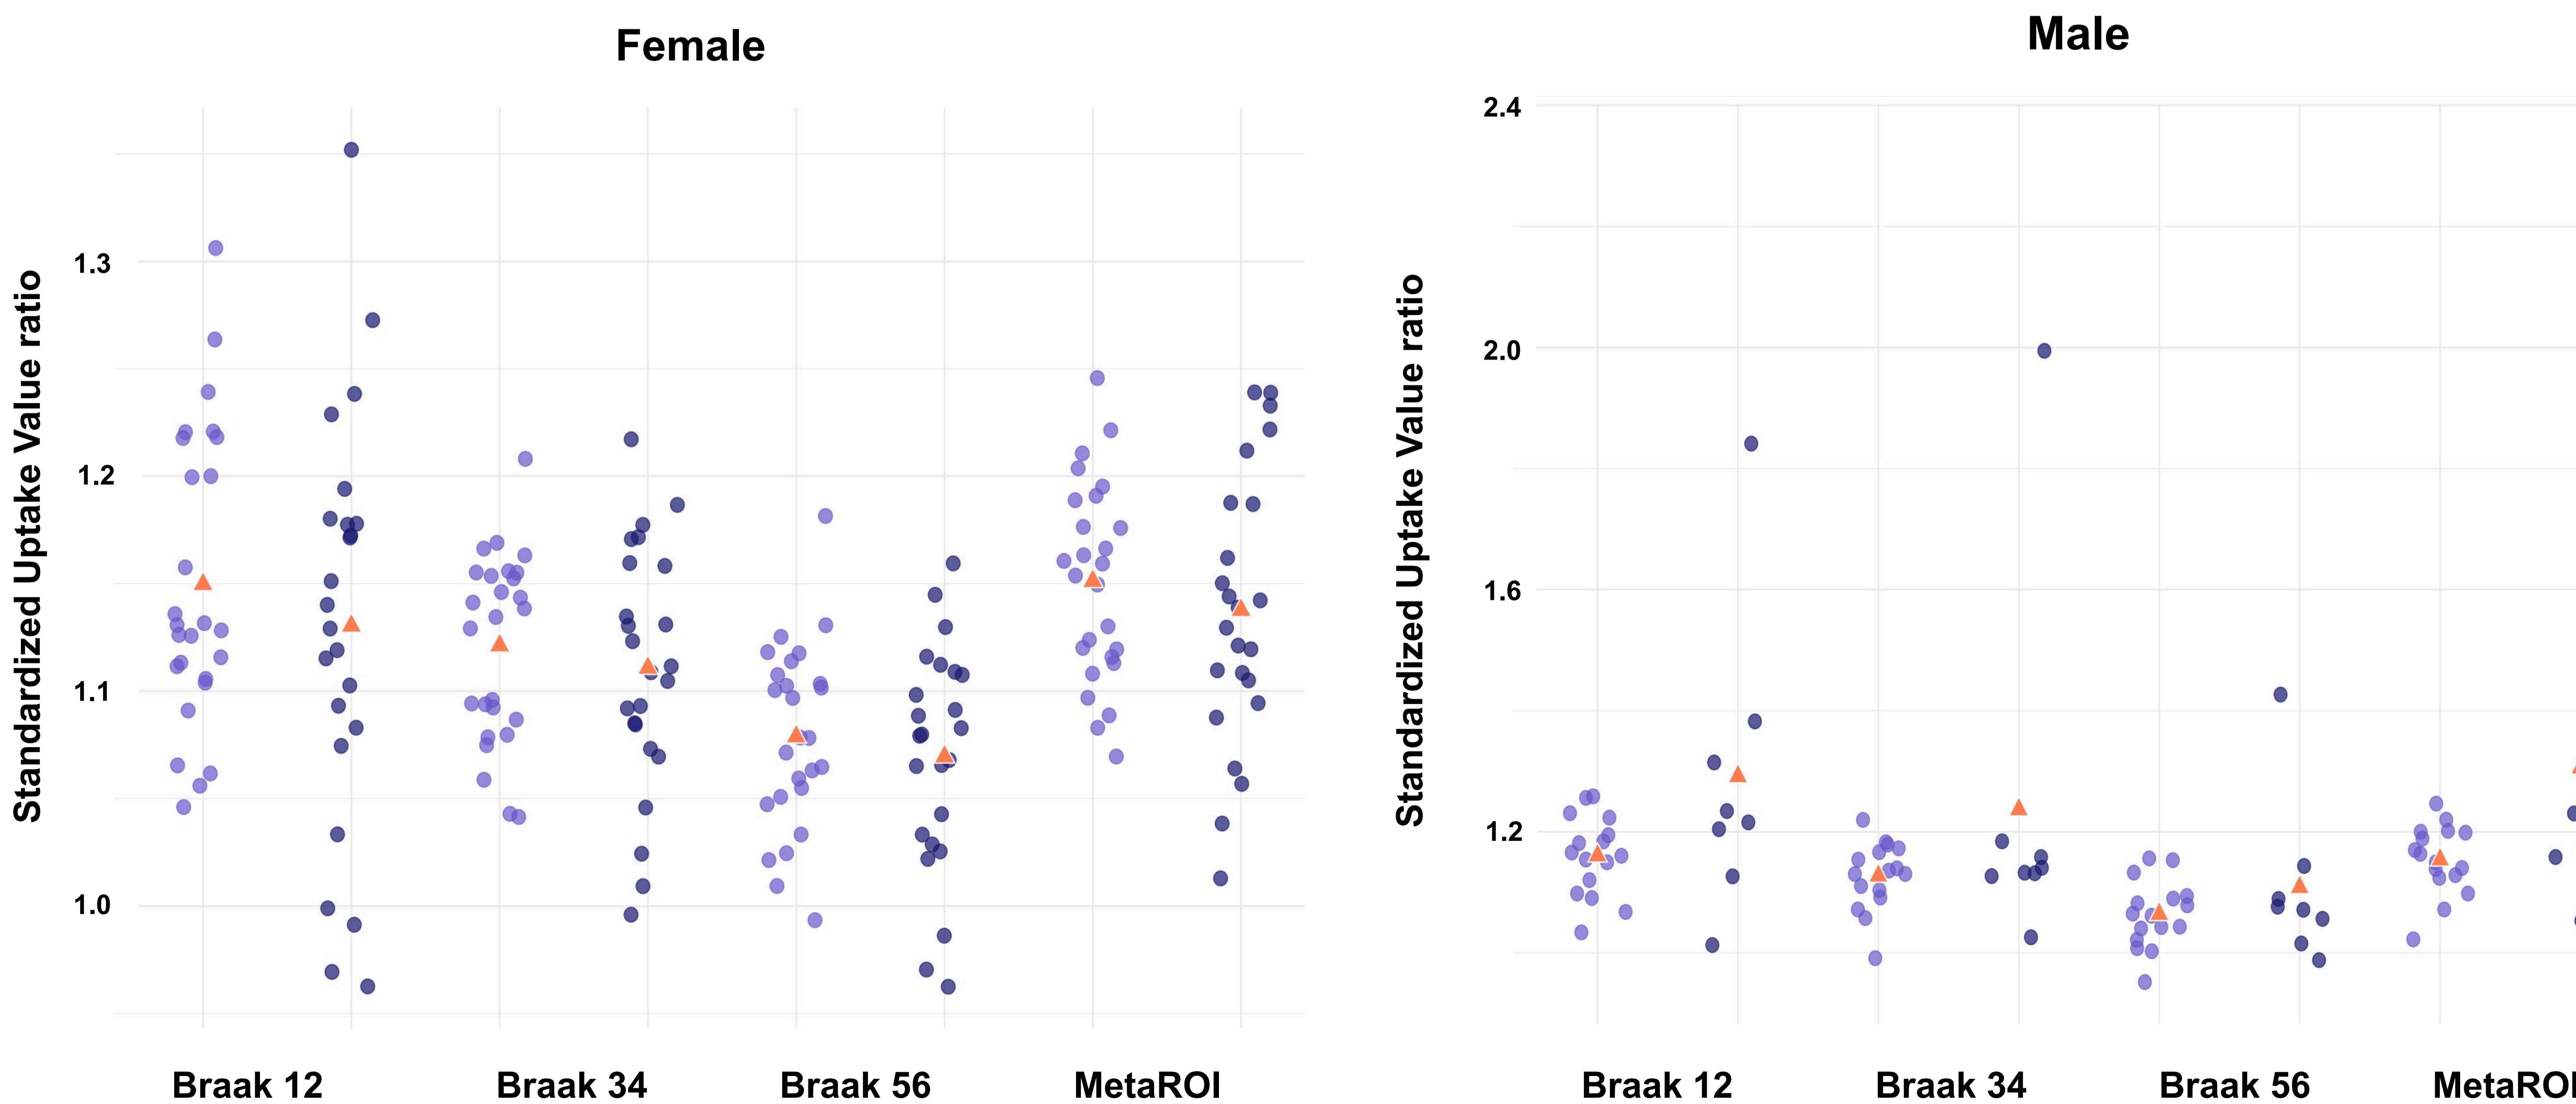

**Supplementary Figure 3.** Sex stratified by *APOE-ε4* carrier status. Imaging biomarker measures comparing *APOE-ε4* male carriers (+) vs. male non-carriers (-) and *APOE-ε4* female carriers (+) vs. female non-carriers (-): (A) EOAD Tau measures (B) EOnonAD Tau measures (C) CN Tau measures.
